# Supplementary material for: Transsynaptic modulation of presynaptic short-term plasticity in hippocampal mossy fiber synapses
Source: PubMed Central journal article supplement (PMC8131630; doi:10.1038/s41467-021-23153-5), 2021-05-18
Supplement: 41467_2021_23153_MOESM1_ESM.pdf [file 41467_2021_23153_MOESM1_ESM.pdf]

**Transsynaptic modulation of presynaptic short-term plasticity in  
hippocampal mossy fiber synapses**

David Vandael<sup>1,2,3,✉</sup>, Yuji Okamoto<sup>1,3</sup>, and Peter Jonas<sup>1,✉</sup>

1 Cellular Neuroscience, IST Austria (Institute of Science and Technology Austria),  
Am Campus 1, A-3400 Klosterneuburg, Austria

2 Present address: Netherlands Institute for Neuroscience, Royal Netherlands  
Academy for Arts and Sciences (KNAW), Meibergdreef 47, 1105 BA, Amsterdam,  
The Netherlands

3 These authors contributed equally.

✉ Corresponding authors. E-mail: [david.vandael@ist.ac.at](mailto:david.vandael@ist.ac.at) or [peter.jonas@ist.ac.at](mailto:peter.jonas@ist.ac.at)

**Corresponding authors:**

Dr. David Vandael

Dr. Peter Jonas

IST Austria (Institute of Science and Technology Austria)

Cellular Neuroscience

Am Campus 1

A-3400 Klosterneuburg, Austria

Phone: 0043-2243-9000-3700

Fax: 0043-2243-9000-2007

E-mail: [david.vandael@ist.ac.at](mailto:david.vandael@ist.ac.at)

E-mail: [peter.jonas@ist.ac.at](mailto:peter.jonas@ist.ac.at)

**Supplementary Figure 1 | Pool analysis of PTP in 0.1 mM and 10 mM EGTA, as in Fig. 2a–c and Fig. 2d–f.**

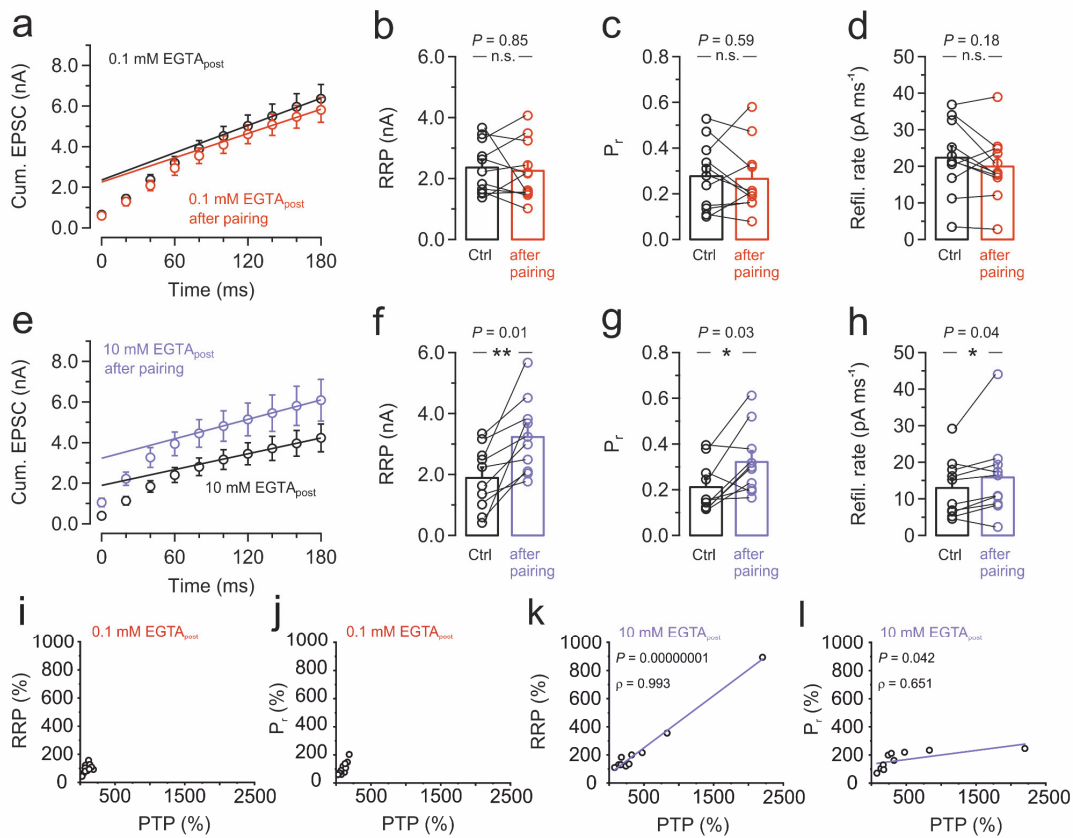

**Supplementary Figure 2 | Transsynaptic modulation of PTP at near-physiological temperature.**

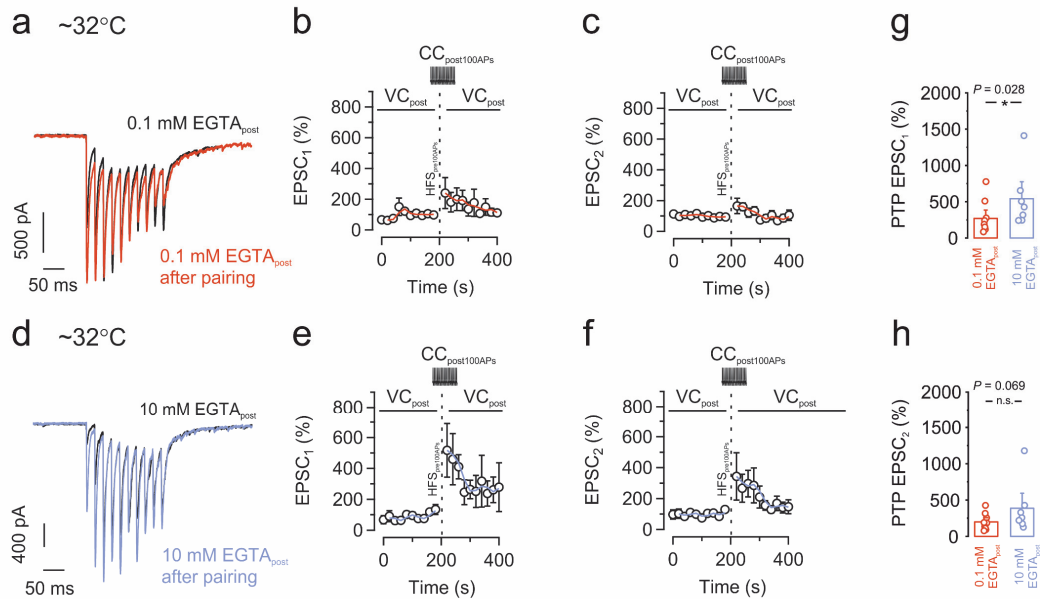

**a,** Representative traces of a 50 Hz train of EPSCs recorded at nearly physiological temperature before and after HFS<sub>100</sub> pairing with 0.1 mM of EGTA in the postsynaptic pipette.

**b,c,** Plots of normalized EPSC<sub>1</sub> and EPSC<sub>2</sub> against experimental time at near-physiological temperature with 0.1 mM EGTA in the postsynaptic pipette.

**d-f,** Similar plots as in (a-c), but with 10 mM of EGTA in the postsynaptic pipette.

**g,h,** Summary bar graphs showing the percentage of PTP at near-physiological temperature after paired HFS<sub>100</sub> stimulation with 0.1 mM EGTA and 10 mM EGTA in the postsynaptic pipette. Data for EPSC<sub>1</sub> (g) and EPSC<sub>2</sub> (h). \* indicates  $P < 0.05$ , and n.s. denotes non-significant difference ( $P \geq 0.05$ ). Note that although the phenomenon of transsynaptic modulation of PTP is preserved, its degree is less prominent at near-physiological temperature than at room temperature, potentially because dendritic APs are shorter or glutamate spillover is less pronounced (Asztely et al., 1997). Data in (b, c) and (g, h, red bar) are from 9 pairs, data in (e, f) and (g, h, blue bar) are from 7 pairs. Error bars indicate SEM.

**Supplementary Figure 3 | Pool analysis of PTP in Ca<sup>2+</sup> channel blockers and mGluR antagonists, as in Fig. 3j–l and Fig. 4d–f.**

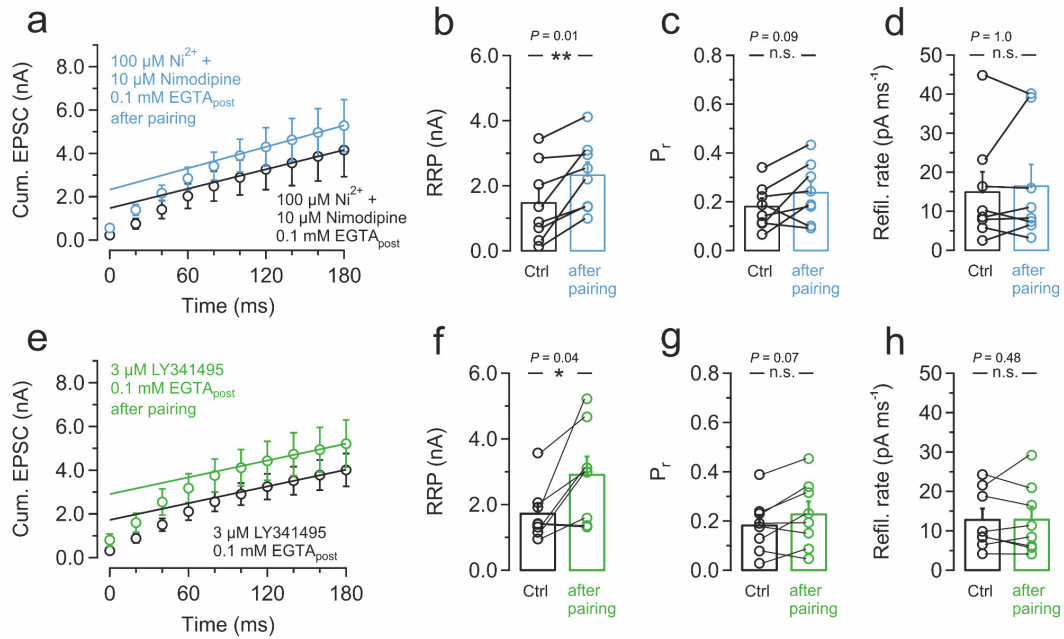

**a–d**, Pool analysis with 100  $\mu\text{M Ni}^{2+}$  and 10  $\mu\text{M}$  nimodipine in the bath and 0.1 mM EGTA in the postsynaptic pipette.

**e–h**, Pool analysis with 3  $\mu\text{M LY341495}$  in the bath and 0.1 mM EGTA in the postsynaptic pipette.

Last 4 data points were fit by linear regression, revealing readily releasable pool (RRP), release probability ( $P_r$ ), and refilling rate. \* indicates  $P < 0.05$ , \*\*  $P < 0.01$ , and n.s. denotes non-significant difference ( $P \geq 0.05$ ). Data in (a–d) are from 8 pairs, data in (e–h) are from 8 pairs. Error bars indicate SEM.

**Supplementary Figure 4 | Summary of effects of all pharmacological manipulations on the magnitude of PTP.**

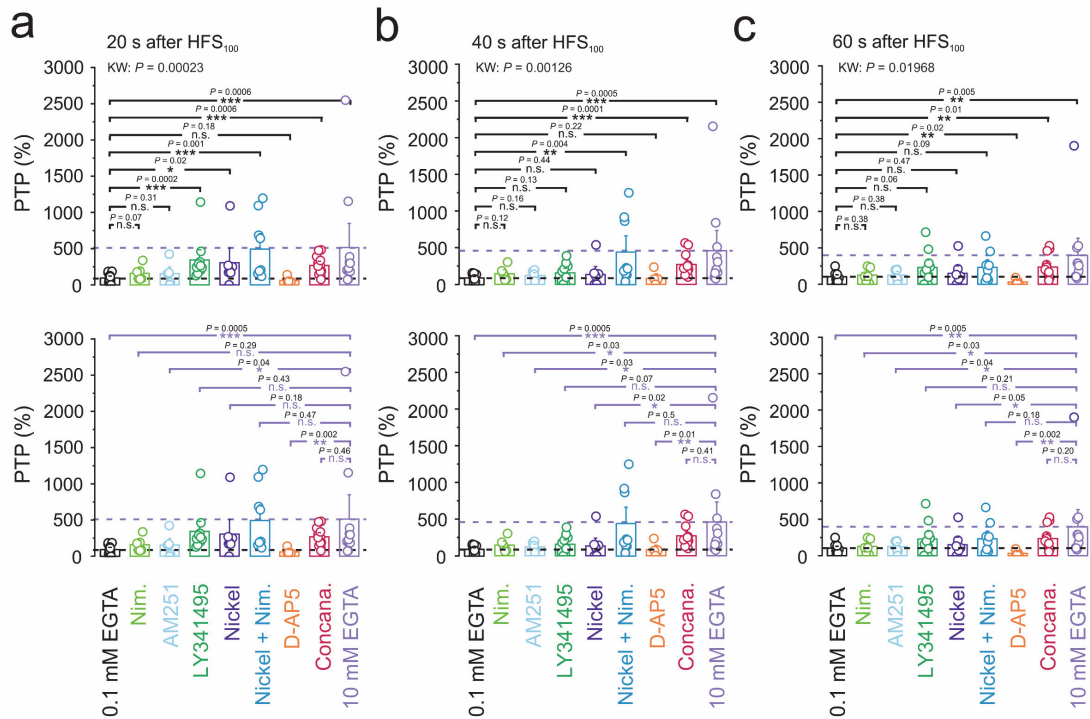

**a**, Comparison of PTP 20 s after HFS<sub>100</sub> in the presence of various pharmacological manipulations with 0.1 mM EGTA (top) and 10 mM EGTA (bottom) in the postsynaptic pipette (representing the upper and lower ceiling of the magnitude of PTP).

**b**, PTP 40 s after HFS<sub>100</sub>.

**c**, PTP 60 s after HFS<sub>100</sub>.

In all mossy fiber terminal–CA3 pyramidal neuron pairs except those shown in the rightmost bar (“EGTA 10 mM”), the postsynaptic pipette solution contained 0.1 mM EGTA. In all pairs, the postsynaptic neuron was held in the current-clamp configuration during PTP induction. In 75 pairs, 100 stimuli were applied to the postsynaptic cells during PTP induction (CC<sub>100APs</sub>). In 28 pairs, the postsynaptic cell was freely spiking during induction (CC<sub>free</sub>). As results with CC<sub>100APs</sub> and CC<sub>free</sub> were not significantly different (Fig. 2g, two leftmost bars), data were pooled. Boxes represent mean values, and circles show individual measurements. Horizontal dashed lines represent 0.1 mM EGTA (bottom line, left bar) and 10 mM EGTA (top line, right bar). Differences were tested for statistical significance using a one-sided

Kruskal-Wallis test ( $\chi^2$  distribution with 9 – 1 degrees of freedom), followed by two-sided Mann-Whitney U tests. \* indicates  $P < 0.05$ , \*\*  $P < 0.01$ , \*\*\*  $P < 0.001$ , and n.s. denotes non-significant difference ( $P \geq 0.05$ ).  $P$  values are given without multiple comparison correction. Note that PTP in the presence of LY341495,  $\text{Ca}^{2+}$  channel blockers, and concanamycin was significantly different from 0.1 mM EGTA ( $P < 0.05$  except LY341495 40 and 60 s after HFS<sub>100</sub> and  $\text{Ca}^{2+}$  channel blockers 60 s after HFS<sub>100</sub>), but not significantly different from 10 mM EGTA ( $P \geq 0.2$  except LY341495 40 s after HFS<sub>100</sub> and  $\text{Ca}^{2+}$  channel blockers 60 s after HFS<sub>100</sub>), suggesting that the blockers largely recover PTP. Also note that the effects of pharmacological manipulations become less clear at later time points after PTP induction. Data are from 13, 6, 6, 10, 7, 9, 5, 12, and 11 pairs, respectively. Error bars indicate SEM.

### **Supplementary Reference**

Asztely, F., Erdemli, G. & Kullmann, D. M. Extrasynaptic glutamate spillover in the hippocampus: dependence on temperature and the role of active glutamate uptake. *Neuron* **18**, 281–293 (1997).
